# Supplementary material for: Myc is a prognostic biomarker and potential therapeutic target in osteosarcoma
Source: PubMed Central journal article supplement — Ther Adv Med Oncol. 2020 May 10;12:1758835920922055. doi: 10.1177/1758835920922055 (PMC7222246; doi:10.1177/1758835920922055), 2020-05-10
Supplement: Supplementary_figure_legends_1.docx-TAM-19-11-563.R1.pdf [file Supplementary_figure_legends_1.docx-TAM-19-11-563.R1.pdf]

**Figure. S1.** TCGA sarcoma patient data of Myc expression was downloaded from OncoLnc (<http://www.oncolnc.org/>). Correlation between the expression of Myc in sarcoma patients and survival (Kaplan-Meier survival curve analysis,  $p= 0.09$ ).

**Figure. S2.** Confirmation of Myc knockdown by siRNA in immunofluorescence assay. Expression of Myc in KHOS and U2OS cells was assessed by immunofluorescence with antibodies to Myc (green) and  $\beta$ -actin (red). Hoechst 33342 was added to counterstain the cell nucleus (blue). Green fluorescence of Myc protein was mainly localized in the nucleus of osteosarcoma cells.

**Figure. S3.** Myc inhibitor 10058-F4 inhibits osteosarcoma cell proliferation and decreases viability in a dose and time-dependent manner (\*\* $p < 0.01$ , \*\*\*  $p < 0.001$  as compared with the untreated control group). Osteosarcoma cell viability was measured by MTT after 2, 3 and 5 days incubation with different concentrations of Myc inhibitor.
