# Supplementary material for: Myc is a prognostic biomarker and potential therapeutic target in osteosarcoma
Source: PubMed Central journal article supplement — Ther Adv Med Oncol. 2020 May 10;12:1758835920922055. doi: 10.1177/1758835920922055 (PMC7222246; doi:10.1177/1758835920922055), 2020-05-10
Supplement: Supplementary_Table_S1.pdf [file Supplementary_Table_S1.pdf]

## Characteristics of os

| Patient | Age | Gender | Date of tumor collecti | Tumor Location                                                          |
|---------|-----|--------|------------------------|-------------------------------------------------------------------------|
| 1       | 56  | M      | #####                  | lung, right femur                                                       |
| 2       | 45  | M      | #####                  | left mid-humerus                                                        |
| 3       | 38  | M      | #####                  | left proximal tibia                                                     |
| 4       | 43  | M      | #####                  | left ischium<br>right proximal<br>posterior thigh, left                 |
| 5       | 33  | M      | #####                  | distal femur origin                                                     |
| 6       | 43  | M      | #####                  | right acetabulum                                                        |
| 7       | 15  | M      | #####                  | left distal femur                                                       |
| 8       | 24  | F      | #####                  | right distal femur<br>right ilium, left femur                           |
| 9       | 38  | F      | #####                  | origin<br>right pelvis, left distal                                     |
| 10      | 27  | M      | #####                  | femur origin<br>left hemipelvis, left                                   |
| 11      | 25  | M      | #####                  | proximal femur origin<br>right proximal radius,<br>right proximal tibia |
| 12      | 16  | F      | #####                  | origin<br>right proximal<br>humerus, right distal                       |
| 13      | 77  | F      | #####                  | femur origin<br>lung and left clavicle,                                 |
| 14      | 34  | M      | #####                  | right tibia origin                                                      |
| 15      | 19  | M      | #####                  | right distal femur<br>lung, right proximal                              |
| 16      | 22  | M      | #####                  | femur origin                                                            |

|    |    |   |                                                   |
|----|----|---|---------------------------------------------------|
| 17 | 15 | F | ##### right femur                                 |
| 18 | 15 | M | ##### left distal femur                           |
| 19 | 15 | M | ##### right distal femur                          |
| 20 | 6  | F | ##### right proximal femur                        |
| 21 | 17 | F | ##### left proximal tibia<br>lung, left proximal  |
| 22 | 17 | M | ##### humerus origin                              |
| 23 | 10 | F | ##### left distal femur<br>right proximal         |
| 24 | 13 | M | ##### humerus                                     |
| 25 | 26 | F | ##### left distal femur<br>lung, right proximal   |
| 26 | 45 | F | ##### humerus origin                              |
| 27 | 17 | M | ##### right proximal tibia<br>left superior pubic |
| 28 | 33 | M | ##### ramus                                       |
| 29 | 29 | M | ##### left pelvis                                 |
| 30 | 59 | M | ##### right clavicle<br>right pubic ramus and     |
| 31 | 70 | F | ##### acetabulum                                  |
| 32 | 19 | F | ##### right distal femur                          |
| 33 | 28 | F | ##### left distal femur                           |
| 34 | 12 | F | ##### left proximal tibia                         |
| 35 | 14 | F | ##### left tibia                                  |
| 36 | 28 | F | ##### right hemipelvis                            |
| 37 | 63 | M | ##### right distal femur                          |
| 38 | 45 | F | ##### left distal femur                           |

|    |    |   |                                                        |
|----|----|---|--------------------------------------------------------|
| 39 | 28 | M | ##### right proximal                                   |
| 40 | 29 | F | ##### right distal femur                               |
| 41 | 17 | M | ##### right distal femur                               |
| 42 | 15 | M | ##### right distal femur                               |
| 43 | 36 | M | ##### right scapula                                    |
| 44 | 17 | M | ##### right proximal femur                             |
| 45 | 16 | F | ##### right proximal tibia<br>right bicep, right chest |
| 46 | 56 | M | ##### wall                                             |
| 47 | 35 | M | ##### right humerus                                    |
| 48 | 65 | M | ##### right distal radius                              |
| 49 | 35 | M | ##### right proximal tibia<br>right scapula and        |
| 50 | 61 | F | ##### clavicle                                         |
| 51 | 26 | F | ##### right femur                                      |
| 52 | 16 | M | ##### right proximal tibia                             |
| 53 | 19 | M | ##### left tibia                                       |
| 54 | 50 | F | ##### left distal femur                                |
| 55 | 54 | F | ##### maxilla                                          |
| 56 | 16 | M | ##### left distal femur<br>pelvis and abdomen,         |
| 57 | 50 | M | ##### right thigh origin                               |
| 58 | 23 | M | ##### right proximal fibula                            |
| 59 | 37 | M | ##### left femur                                       |
| 60 | 17 | F | ##### lung, left tibia origin                          |

|    |    |   |                                    |
|----|----|---|------------------------------------|
| 61 | 19 | F | ##### right distal femur           |
| 62 | 20 | M | ##### right proximal               |
| 63 | 19 | M | ##### right distal femur           |
| 64 | 76 | M | ##### T10<br>chest wall, radiation |
| 65 | 55 | F | ##### induced                      |
| 66 | 21 | M | ##### left femur                   |
| 67 | 24 | M | ##### left proximal tibia          |
| 68 | 39 | F | ##### right distal femur           |
| 69 | 34 | M | ##### left foot                    |

Abbreviations: AWD, alive with disease/follow-up cor  
M, Male;N/A, Not applicable; NED, No

## osteosarcoma patients and their tumor samples

| <b>Histologic subtype</b> | <b>Grade</b> | <b>Eventual metastasis</b> | <b>Metastasis location</b> | <b>Eventual recurrence</b> |
|---------------------------|--------------|----------------------------|----------------------------|----------------------------|
| osteoblastic              | 2-3          | yes                        | lung                       | no                         |
| juxtacortical             | 2            | yes                        | lung                       | no                         |
| chondroblastic            | 2            | yes                        | lung                       | yes                        |
| osteoblastic              | 2            | yes                        | lung                       | no                         |
|                           | 2-3          | yes                        | lung, thigh                | no                         |
| chondroblastic            | 2            | yes                        | lung                       | yes                        |
| osteoblastic              | 3            | yes                        | lung                       | yes                        |
| juxtacortical             | 1            | no                         | n/a                        | yes                        |
|                           | 2            | yes                        | pelvis                     | no                         |
| chondroid                 | 2            | yes                        | chest wall, pelvis         | yes (pelvis)               |
|                           | 2-3          | yes                        | pelvis                     | yes                        |
| osteoblastic              | 3            | yes                        | chest wall                 | yes                        |
|                           | 2-3          | yes                        | humerus                    | no                         |
|                           | 3            | yes                        | lung, clavicle             | no                         |
| telangiectic              | 3            | no                         | n/a                        | no                         |
| chondroblastic            | 2            | yes                        | lung                       | yes                        |

|                        |     |     |                |     |
|------------------------|-----|-----|----------------|-----|
|                        | 2   | no  | n/a            | no  |
| osteoblastic           | 3   | yes | lung           | no  |
| mixed fibroblastic and |     |     |                |     |
| osteoblastic           | 2   | no  | n/a            | no  |
| osteoblastic           | 3   | yes | lung           | no  |
| osteoblastic           | 3   | yes | lung           | no  |
|                        | 3   | yes | lung           | no  |
| osteoblastic           | 3   | yes | lung           | no  |
| mixed osteoblastic     |     |     |                |     |
| and chondroblastic     | 3   | yes | lung           | yes |
| juxtacortical, mixed   |     |     |                |     |
| osteoblastic,          |     |     |                |     |
| chondroblastic and     |     |     |                |     |
| fibroblastic           | 2   | no  | n/a            | no  |
|                        |     |     |                |     |
| epithelioid            | 3   | yes | lung           | no  |
| giant cell rich        | 3   | no  | n/a            | no  |
| conventional           |     |     |                |     |
| osteosarcoma           | 2-3 | yes | lung           | no  |
|                        | 3   | yes | left flank     | yes |
|                        | 2-3 | yes | lung, spine    | no  |
| mixed osteoblastic     |     |     |                |     |
| and fibroblastic       | 1   | no  | n/a            | yes |
| osteoblastic           | 2   | yes | lung           | no  |
|                        | 2-3 | yes | lung, renal, c | no  |
| osteoblastic           | 3   | no  | n/a            | no  |
| telangiectic           | 3   | no  | n/a            | no  |
| chondroblastic         | 2   | yes | lung           | no  |
| osteoblastic           | 2   | yes | lung, spine    | yes |
| osteoblastic           | 2-3 | yes | lung           | no  |

|                      |     |     |                 |           |
|----------------------|-----|-----|-----------------|-----------|
|                      | 1-2 | yes | lung            | yes (met) |
| juxtacortical, well  | 1   | yes | lung            | yes (met) |
| chondroblastic       | 3   | yes | lung            | no        |
|                      | 2-3 | yes | lung            | yes (met) |
| juxtacortical, mixed |     |     |                 |           |
| chondroblastic and   |     |     |                 |           |
| osteoblastic         | 1-2 | no  | n/a             | no        |
| osteoblastic         | 2-3 | yes | lung            | yes (met) |
| osteoblastic         | 2-3 | yes | lung, brain     | no        |
| fibroblastic         | 2   | yes | lung            | yes       |
| parosteal            | 1-2 | no  | n/a             | yes       |
| mixed osteoblastic,  |     |     |                 |           |
| fibroblastic and     |     |     |                 |           |
| chondroblastic       | 1-2 | yes | lung, sternun   | no        |
|                      | 3   | yes | lung            | no        |
|                      | 2-3 | yes | lung            | yes       |
|                      | 3   | yes | lung, brain     | yes       |
| osteoblastic         | 3   | no  | n/a             | no        |
| chondroblastic       | 2   | yes | lung, brain, h  | no        |
| chondroblastic       | 2-3 | yes | lung            | yes       |
| well differentiated  | 1   | no  | n/a             | no        |
| osteoblastic         | 2-3 | no  | n/a             | no        |
|                      | 3   | yes | lung, pelvis, s | no        |
|                      | 3   | yes | lung            | yes (met) |
| mixed osteoblastic   |     |     |                 |           |
| and chondroblastic   | 3   | no  | n/a             | no        |
|                      | 2-3 | yes | lung            | no        |

|                                                                                                   |        |          |                |          |
|---------------------------------------------------------------------------------------------------|--------|----------|----------------|----------|
| predominantly<br>osteoblastic and<br>fibroblastic with focal<br>chondroblastic<br>differentiation | 2      | yes      | lung, kidney   | no       |
| chondroblastic<br>parosteal                                                                       | 2<br>1 | no<br>no | n/a<br>n/a     | no<br>no |
| chondroblastic                                                                                    | 2      | no       | n/a            | no       |
| chondroblastic                                                                                    | 2-3    | no       | n/a            | no       |
|                                                                                                   | 2      | no       | n/a            | no       |
| osteoblastic                                                                                      | 2-3    | yes      | lung, renal, a | no       |
| fibroblastic                                                                                      | 2      | no       | n/a            | no       |
| parosteal                                                                                         | 2      | yes      | lung           | no       |

mplications; DFS, Disease free survival; DOD, dead of disease; F, Fe  
o evidence of disease; TOX, Toxicity; UKN, Unknown.



| <b>Disease status</b> | <b>LFU</b> | <b>Myc-satining score</b> |
|-----------------------|------------|---------------------------|
| DOD                   | #####      | 3                         |
| NED+tox               | #####      | 3                         |
| DOD                   | #####      | 4                         |
| NED                   | #####      | 2                         |
| DOD                   | #####      | 4                         |
| DOD                   | #####      | 1                         |
| DOD                   | #####      | 2                         |
| NED                   | #####      | 0                         |
| DOD                   | #####      | 0                         |
| DOD                   | #####      | 5                         |
| DOD                   | #####      | 3                         |
| DOD                   | #####      | 3                         |
| DOD                   | #####      | 4                         |
| DOD                   | #####      | 3                         |
| NED                   | #####      | 1                         |
| NED                   | #####      | 1                         |

|           |       |   |
|-----------|-------|---|
| NED       | ##### | 1 |
| DOD       | ##### | 3 |
|           |       |   |
| NED       | ##### | 1 |
| unknown   | ##### | 2 |
| DOD       | ##### | 4 |
|           |       |   |
| DOD       | ##### | 5 |
| NED       | ##### | 0 |
|           |       |   |
| DOD       | ##### | 3 |
|           |       |   |
| NED       | ##### | 0 |
|           |       |   |
| AWED      | ##### | 3 |
| NED       | ##### | 2 |
|           |       |   |
| DOD       | ##### | 3 |
| DOD       | ##### | 2 |
| DOD       | ##### | 0 |
|           |       |   |
| DOD       | ##### | 2 |
| DOD       | ##### | 3 |
| DOD       | ##### | 1 |
| NED, died | ##### | 1 |
| NED       | ##### | 2 |
| NED       | ##### | 1 |
| DOD       | ##### | 2 |
| DOD       | ##### | 3 |

|         |       |   |
|---------|-------|---|
| unknown | ##### | 0 |
| DOD     | ##### | 0 |
| DOD     | ##### | 3 |
| DOD     | ##### | 3 |

|         |       |   |
|---------|-------|---|
| unknown | ##### | 5 |
| DOD     | ##### | 3 |
| DOD     | ##### | 1 |

|     |       |   |
|-----|-------|---|
| DOD | ##### | 3 |
| NED | ##### | 1 |

|     |       |   |
|-----|-------|---|
| DOD | ##### | 3 |
| DOD | ##### | 4 |

|     |       |   |
|-----|-------|---|
| DOD | ##### | 2 |
| DOD | ##### | 5 |
| NED | ##### | 4 |
| DOD | ##### | 2 |
| DOD | ##### | 4 |
| NED | ##### | 1 |
| NED | ##### | 4 |

|     |       |   |
|-----|-------|---|
| DOD | ##### | 5 |
| NED | ##### | 4 |

|     |       |   |
|-----|-------|---|
| DOD | ##### | 1 |
| NED | ##### | 5 |

|         |       |   |
|---------|-------|---|
| DOD     | ##### | 0 |
| NED     | ##### | 1 |
| NED     | ##### | 1 |
| NED     | ##### | 3 |
|         |       |   |
| AWED    | ##### | 0 |
| NED+tox | ##### | 1 |
| DOD     | ##### | 5 |
| NED     | ##### | 3 |
| AWED    | ##### | 1 |

male; LFU: Last follow-up;
