# Supplementary material for: Myc is a prognostic biomarker and potential therapeutic target in osteosarcoma
Source: PubMed Central journal article supplement — Ther Adv Med Oncol. 2020 May 10;12:1758835920922055. doi: 10.1177/1758835920922055 (PMC7222246; doi:10.1177/1758835920922055), 2020-05-10
Supplement: Supplementary_Table_S2.pdf [file Supplementary_Table_S2.pdf]

The mRNA level of Myc in osteosarcoma. This data is downloaded from TCGA. The read counts are RSEM

| Patient    | Days | Months | Status | Myc Express | Group |
|------------|------|--------|--------|-------------|-------|
| TCGA-DX-A  | 897  | 29.9   | Dead   | 38.61       | Low   |
| TCGA-MO-7  | 318  | 10.6   | Dead   | 46.18       | Low   |
| TCGA-IS-A3 | 413  | 13.8   | Dead   | 101.42      | Low   |
| TCGA-DX-A  | 2085 | 69.5   | Alive  | 155.61      | Low   |
| TCGA-IS-A3 | 858  | 28.6   | Dead   | 239.49      | Low   |
| TCGA-MO-7  | 352  | 11.7   | Alive  | 241.4       | Low   |
| TCGA-X9-A  | 831  | 27.7   | Alive  | 242.67      | Low   |
| TCGA-DX-A  | 1534 | 51.1   | Alive  | 250.89      | Low   |
| TCGA-DX-A  | 923  | 30.8   | Alive  | 251.9       | Low   |
| TCGA-DX-A  | 1049 | 35     | Dead   | 252.56      | Low   |
| TCGA-DX-A  | 1605 | 53.5   | Alive  | 254.88      | Low   |
| TCGA-IS-A3 | 5204 | 173.5  | Alive  | 276.75      | Low   |
| TCGA-QQ-7  | 5723 | 190.8  | Alive  | 282.76      | Low   |
| TCGA-IE-A4 | 42   | 1.4    | Alive  | 288.14      | Low   |
| TCGA-WK-7  | 2579 | 86     | Alive  | 312.62      | Low   |
| TCGA-PC-A  | 1142 | 38.1   | Dead   | 316.5       | Low   |
| TCGA-DX-A  | 738  | 24.6   | Dead   | 345.65      | Low   |
| TCGA-IF-A4 | 767  | 25.6   | Dead   | 350.91      | Low   |
| TCGA-3B-A  | 1096 | 36.5   | Alive  | 367.59      | Low   |
| TCGA-DX-A  | 200  | 6.7    | Dead   | 373.57      | Low   |
| TCGA-X6-A  | 896  | 29.9   | Alive  | 380.28      | Low   |
| TCGA-DX-A  | 3310 | 110.3  | Alive  | 380.6       | Low   |
| TCGA-K1-A  | 1891 | 63     | Alive  | 400.87      | Low   |
| TCGA-DX-A  | 2515 | 83.8   | Alive  | 402.98      | Low   |
| TCGA-DX-A  | 2247 | 74.9   | Alive  | 403.23      | Low   |
| TCGA-3B-A  | 567  | 18.9   | Dead   | 419.14      | Low   |
| TCGA-DX-A  | 456  | 15.2   | Dead   | 455.09      | Low   |
| TCGA-QQ-7  | 3964 | 132.1  | Alive  | 462.57      | Low   |
| TCGA-3B-A  | 2085 | 69.5   | Alive  | 465.45      | Low   |
| TCGA-DX-A  | 846  | 28.2   | Dead   | 488.05      | Low   |
| TCGA-DX-A  | 1143 | 38.1   | Alive  | 498.32      | Low   |
| TCGA-X2-A  | 1927 | 64.2   | Alive  | 509.07      | Low   |
| TCGA-FX-A  | 947  | 31.6   | Alive  | 518.04      | Low   |
| TCGA-DX-A  | 1359 | 45.3   | Alive  | 519.2       | Low   |
| TCGA-WP-7  | 261  | 8.7    | Dead   | 521.81      | Low   |
| TCGA-WK-7  | 1991 | 66.4   | Dead   | 527.12      | Low   |
| TCGA-QQ-7  | 56   | 1.9    | Alive  | 530.44      | Low   |
| TCGA-SI-A7 | 771  | 25.7   | Alive  | 532.42      | Low   |
| TCGA-MJ-A  | 456  | 15.2   | Alive  | 533         | Low   |
| TCGA-PC-A  | 2464 | 82.1   | Dead   | 534.81      | Low   |
| TCGA-DX-A  | 2291 | 76.4   | Alive  | 542.3       | Low   |
| TCGA-IE-A3 | 2448 | 81.6   | Dead   | 579.6       | Low   |
| TCGA-IE-A4 | 594  | 19.8   | Alive  | 585.57      | Low   |
| TCGA-3B-A  | 314  | 10.5   | Alive  | 590.85      | Low   |

|            |      |       |       |         |     |
|------------|------|-------|-------|---------|-----|
| TCGA-PC-A  | 3740 | 124.7 | Alive | 595.61  | Low |
| TCGA-X6-A  | 1092 | 36.4  | Alive | 606.51  | Low |
| TCGA-RN-A  | 510  | 17    | Alive | 611.68  | Low |
| TCGA-DX-A  | 463  | 15.4  | Alive | 649.32  | Low |
| TCGA-IF-A4 | 1590 | 53    | Alive | 660.77  | Low |
| TCGA-DX-A  | 325  | 10.8  | Dead  | 670.01  | Low |
| TCGA-FX-A  | 660  | 22    | Alive | 679.96  | Low |
| TCGA-MB-/  | 15   | 0.5   | Alive | 689.52  | Low |
| TCGA-DX-A  | 138  | 4.6   | Dead  | 696.51  | Low |
| TCGA-DX-A  | 1552 | 51.7  | Dead  | 699.67  | Low |
| TCGA-QQ-/  | 1970 | 65.7  | Dead  | 702.87  | Low |
| TCGA-SI-A7 | 996  | 33.2  | Alive | 716.72  | Low |
| TCGA-QQ-/  | 550  | 18.3  | Dead  | 718.43  | Low |
| TCGA-VT-A  | 379  | 12.6  | Alive | 724.66  | Low |
| TCGA-DX-A  | 805  | 26.8  | Alive | 730.07  | Low |
| TCGA-IS-A3 | 4845 | 161.5 | Alive | 745.1   | Low |
| TCGA-DX-A  | 546  | 18.2  | Alive | 761.1   | Low |
| TCGA-DX-A  | 2641 | 88    | Alive | 764.71  | Low |
| TCGA-DX-A  | 1073 | 35.8  | Alive | 765.17  | Low |
| TCGA-IW-A  | 688  | 22.9  | Alive | 766.57  | Low |
| TCGA-K1-A  | 3080 | 102.7 | Alive | 774.5   | Low |
| TCGA-FX-A  | 1495 | 49.8  | Alive | 781.36  | Low |
| TCGA-DX-A  | 3079 | 102.6 | Alive | 786.89  | Low |
| TCGA-DX-A  | 1885 | 62.8  | Alive | 795.71  | Low |
| TCGA-DX-A  | 2599 | 86.6  | Dead  | 803.3   | Low |
| TCGA-3B-A  | 2694 | 89.8  | Dead  | 807.29  | Low |
| TCGA-DX-A  | 928  | 30.9  | Alive | 815.45  | Low |
| TCGA-DX-A  | 1055 | 35.2  | Alive | 825.24  | Low |
| TCGA-DX-A  | 35   | 1.2   | Dead  | 851.7   | Low |
| TCGA-DX-A  | 1892 | 63.1  | Alive | 856.09  | Low |
| TCGA-QQ-/  | 1092 | 36.4  | Alive | 859.23  | Low |
| TCGA-DX-A  | 1548 | 51.6  | Alive | 869.83  | Low |
| TCGA-QQ-/  | 1478 | 49.3  | Dead  | 883.1   | Low |
| TCGA-HB-A  | 139  | 4.6   | Dead  | 894.06  | Low |
| TCGA-RN-A  | 22   | 0.7   | Alive | 921.87  | Low |
| TCGA-FX-A  | 471  | 15.7  | Alive | 933.78  | Low |
| TCGA-DX-A  | 1138 | 37.9  | Alive | 939.03  | Low |
| TCGA-SI-A2 | 262  | 8.7   | Dead  | 942.68  | Low |
| TCGA-DX-A  | 1061 | 35.4  | Dead  | 950.25  | Low |
| TCGA-LI-A6 | 922  | 30.7  | Alive | 961.36  | Low |
| TCGA-DX-A  | 1105 | 36.8  | Alive | 984.22  | Low |
| TCGA-QC-A  | 398  | 13.3  | Alive | 992.85  | Low |
| TCGA-FX-A  | 618  | 20.6  | Alive | 1005.37 | Low |
| TCGA-DX-A  | 2087 | 69.6  | Alive | 1006.11 | Low |
| TCGA-DX-A  | 1533 | 51.1  | Alive | 1009.17 | Low |
| TCGA-MB-/  | 600  | 20    | Alive | 1020.48 | Low |
| TCGA-MB-/  | 661  | 22    | Alive | 1023.82 | Low |

|            |      |             |              |
|------------|------|-------------|--------------|
| TCGA-DX-A  | 2044 | 68.1 Alive  | 1057.89 Low  |
| TCGA-DX-A  | 3238 | 107.9 Alive | 1068.77 Low  |
| TCGA-DX-A  | 2586 | 86.2 Alive  | 1073.91 Low  |
| TCGA-IE-A4 | 819  | 27.3 Alive  | 1079.28 Low  |
| TCGA-X6-A  | 938  | 31.3 Alive  | 1088.47 Low  |
| TCGA-DX-A  | 2007 | 66.9 Alive  | 1092.87 Low  |
| TCGA-LI-A9 | 540  | 18 Dead     | 1123.73 Low  |
| TCGA-PC-A  | 550  | 18.3 Dead   | 1129.31 Low  |
| TCGA-SI-A# | 597  | 19.9 Alive  | 1130.09 Low  |
| TCGA-X6-A  | 1070 | 35.7 Alive  | 1140.59 Low  |
| TCGA-DX-A  | 1247 | 41.6 Alive  | 1144.92 Low  |
| TCGA-DX-A  | 296  | 9.9 Dead    | 1148.64 Low  |
| TCGA-HB-A  | 1061 | 35.4 Dead   | 1162.17 Low  |
| TCGA-DX-A  | 391  | 13 Dead     | 1169.64 Low  |
| TCGA-K1-A  | 528  | 17.6 Alive  | 1174 Low     |
| TCGA-DX-A  | 1161 | 38.7 Alive  | 1188.87 Low  |
| TCGA-WK-/  | 1722 | 57.4 Dead   | 1191.46 Low  |
| TCGA-Z4-A: | 133  | 4.4 Alive   | 1210.71 Low  |
| TCGA-JV-A: | 499  | 16.6 Alive  | 1214.93 Low  |
| TCGA-DX-A  | 721  | 24 Alive    | 1220.26 Low  |
| TCGA-IE-A4 | 98   | 3.3 Alive   | 1235.87 Low  |
| TCGA-X9-A  | 1108 | 36.9 Alive  | 1240.96 Low  |
| TCGA-DX-A  | 4150 | 138.3 Alive | 1245.54 Low  |
| TCGA-DX-A  | 1400 | 46.7 Alive  | 1252.02 Low  |
| TCGA-HB-A  | 384  | 12.8 Dead   | 1257.77 Low  |
| TCGA-DX-A  | 1953 | 65.1 Dead   | 1258.25 Low  |
| TCGA-MB-/  | 252  | 8.4 Alive   | 1275.05 Low  |
| TCGA-DX-A  | 4627 | 154.2 Alive | 1279.86 Low  |
| TCGA-3B-A  | 1303 | 43.4 Alive  | 1280.3 Low   |
| TCGA-DX-A  | 3102 | 103.4 Alive | 1286.91 Low  |
| TCGA-3B-A  | 1521 | 50.7 Alive  | 1296.44 Low  |
| TCGA-X6-A  | 1547 | 51.6 Alive  | 1297.49 Low  |
| TCGA-DX-A  | 295  | 9.8 Dead    | 1298.59 Low  |
| TCGA-DX-A  | 482  | 16.1 Alive  | 1299.48 Low  |
| TCGA-3B-A  | 808  | 26.9 Alive  | 1299.56 Low  |
| TCGA-DX-A  | 564  | 18.8 Dead   | 1308.44 Low  |
| TCGA-3B-A  | 437  | 14.6 Dead   | 1326.82 Low  |
| TCGA-FX-A: | 605  | 20.2 Dead   | 1348.4 Low   |
| TCGA-IW-A  | 180  | 6 Dead      | 1384.75 High |
| TCGA-3B-A  | 1627 | 54.2 Dead   | 1414.02 High |
| TCGA-HS-A  | 22   | 0.7 Dead    | 1421.74 High |
| TCGA-K1-A  | 1622 | 54.1 Alive  | 1430.61 High |
| TCGA-3B-A  | 768  | 25.6 Alive  | 1439.12 High |
| TCGA-QQ-/  | 1424 | 47.5 Dead   | 1480.96 High |
| TCGA-MB-/  | 773  | 25.8 Alive  | 1494.57 High |
| TCGA-DX-A  | 1240 | 41.3 Alive  | 1507.55 High |
| TCGA-X6-A  | 550  | 18.3 Dead   | 1522.58 High |

|            |      |             |              |
|------------|------|-------------|--------------|
| TCGA-3B-A  | 1170 | 39 Alive    | 1533.1 High  |
| TCGA-DX-A  | 1116 | 37.2 Dead   | 1553.08 High |
| TCGA-QQ-/  | 1129 | 37.6 Alive  | 1582.51 High |
| TCGA-IF-A3 | 1129 | 37.6 Dead   | 1586.92 High |
| TCGA-DX-A  | 1456 | 48.5 Alive  | 1598.86 High |
| TCGA-DX-A  | 261  | 8.7 Alive   | 1599.09 High |
| TCGA-DX-A  | 995  | 33.2 Dead   | 1607.05 High |
| TCGA-DX-A  | 1230 | 41 Alive    | 1607.65 High |
| TCGA-HB-A  | 1126 | 37.5 Alive  | 1620.68 High |
| TCGA-DX-A  | 2036 | 67.9 Alive  | 1642.45 High |
| TCGA-3B-A  | 1104 | 36.8 Alive  | 1681.47 High |
| TCGA-QQ-/  | 3406 | 113.5 Alive | 1706.04 High |
| TCGA-DX-A  | 3241 | 108 Alive   | 1711.39 High |
| TCGA-DX-A  | 1399 | 46.6 Alive  | 1783.14 High |
| TCGA-UE-A  | 402  | 13.4 Alive  | 1784.55 High |
| TCGA-DX-A  | 2169 | 72.3 Alive  | 1789.01 High |
| TCGA-DX-A  | 821  | 27.4 Alive  | 1794.86 High |
| TCGA-DX-A  | 1845 | 61.5 Dead   | 1800.1 High  |
| TCGA-DX-A  | 972  | 32.4 Alive  | 1816.5 High  |
| TCGA-KD-A  | 1073 | 35.8 Dead   | 1826.08 High |
| TCGA-DX-A  | 695  | 23.2 Dead   | 1828.18 High |
| TCGA-DX-A  | 275  | 9.2 Dead    | 1849.79 High |
| TCGA-3B-A  | 1366 | 45.5 Dead   | 1852.75 High |
| TCGA-WK-/  | 1164 | 38.8 Dead   | 1864.84 High |
| TCGA-KD-A  | 1941 | 64.7 Dead   | 1867.5 High  |
| TCGA-X6-A  | 1379 | 46 Alive    | 1876.29 High |
| TCGA-DX-A  | 978  | 32.6 Dead   | 1923.91 High |
| TCGA-DX-A  | 850  | 28.3 Dead   | 1925.52 High |
| TCGA-DX-A  | 428  | 14.3 Alive  | 1928.42 High |
| TCGA-KD-A  | 499  | 16.6 Alive  | 1933.62 High |
| TCGA-DX-A  | 2901 | 96.7 Alive  | 1944.12 High |
| TCGA-DX-A  | 280  | 9.3 Alive   | 1951.42 High |
| TCGA-3B-A  | 1665 | 55.5 Alive  | 1984.02 High |
| TCGA-X6-A  | 583  | 19.4 Alive  | 2004.04 High |
| TCGA-Z4-A. | 486  | 16.2 Alive  | 2030.56 High |
| TCGA-DX-A  | 191  | 6.4 Dead    | 2053.9 High  |
| TCGA-DX-A  | 2408 | 80.3 Alive  | 2059.85 High |
| TCGA-DX-A  | 160  | 5.3 Dead    | 2093.68 High |
| TCGA-SI-A7 | 694  | 23.1 Dead   | 2096.19 High |
| TCGA-QQ-/  | 320  | 10.7 Dead   | 2133.91 High |
| TCGA-DX-A  | 2575 | 85.8 Dead   | 2165 High    |
| TCGA-DX-A  | 969  | 32.3 Alive  | 2165.31 High |
| TCGA-FX-A. | 505  | 16.8 Alive  | 2173.08 High |
| TCGA-DX-A  | 2369 | 79 Alive    | 2174.06 High |
| TCGA-SG-A  | 576  | 19.2 Alive  | 2174.24 High |
| TCGA-DX-A  | 2034 | 67.8 Dead   | 2185.28 High |
| TCGA-DX-A  | 478  | 15.9 Alive  | 2191.91 High |

|           |      |       |       |         |      |
|-----------|------|-------|-------|---------|------|
| TCGA-DX-A | 1045 | 34.8  | Alive | 2212.43 | High |
| TCGA-DX-A | 610  | 20.3  | Alive | 2224.49 | High |
| TCGA-DX-A | 367  | 12.2  | Dead  | 2252.15 | High |
| TCGA-KF-A | 356  | 11.9  | Alive | 2286.32 | High |
| TCGA-DX-A | 1235 | 41.2  | Dead  | 2294.45 | High |
| TCGA-DX-A | 2271 | 75.7  | Alive | 2302.54 | High |
| TCGA-QC-A | 537  | 17.9  | Alive | 2353.48 | High |
| TCGA-X6-A | 1067 | 35.6  | Dead  | 2362.7  | High |
| TCGA-DX-A | 93   | 3.1   | Dead  | 2424.12 | High |
| TCGA-DX-A | 1020 | 34    | Dead  | 2486.99 | High |
| TCGA-Z4-A | 485  | 16.2  | Alive | 2548.59 | High |
| TCGA-SG-A | 118  | 3.9   | Dead  | 2554.5  | High |
| TCGA-UE-A | 408  | 13.6  | Alive | 2558.95 | High |
| TCGA-K1-A | 158  | 5.3   | Alive | 2559.73 | High |
| TCGA-DX-A | 485  | 16.2  | Dead  | 2564.4  | High |
| TCGA-DX-A | 591  | 19.7  | Dead  | 2569.65 | High |
| TCGA-SG-A | 533  | 17.8  | Alive | 2573.66 | High |
| TCGA-DX-A | 284  | 9.5   | Dead  | 2575.58 | High |
| TCGA-DX-A | 1372 | 45.7  | Alive | 2654.21 | High |
| TCGA-DX-A | 1649 | 55    | Dead  | 2667.8  | High |
| TCGA-DX-A | 1492 | 49.7  | Alive | 2679.81 | High |
| TCGA-HS-A | 298  | 9.9   | Alive | 2723.91 | High |
| TCGA-N1-A | 224  | 7.5   | Dead  | 2765.63 | High |
| TCGA-K1-A | 711  | 23.7  | Dead  | 2901.31 | High |
| TCGA-3B-A | 959  | 32    | Alive | 2905.88 | High |
| TCGA-MJ-A | 547  | 18.2  | Alive | 2906.89 | High |
| TCGA-IW-A | 2615 | 87.2  | Alive | 2910.11 | High |
| TCGA-WK-/ | 688  | 22.9  | Dead  | 2939.15 | High |
| TCGA-K1-A | 3765 | 125.5 | Alive | 2972.53 | High |
| TCGA-HS-A | 1013 | 33.8  | Alive | 2997.78 | High |
| TCGA-DX-A | 2619 | 87.3  | Alive | 3038.48 | High |
| TCGA-X6-A | 804  | 26.8  | Dead  | 3038.89 | High |
| TCGA-DX-A | 365  | 12.2  | Alive | 3043.18 | High |
| TCGA-DX-A | 1088 | 36.3  | Dead  | 3048.95 | High |
| TCGA-DX-A | 1466 | 48.9  | Dead  | 3065.02 | High |
| TCGA-WK-/ | 146  | 4.9   | Dead  | 3080.9  | High |
| TCGA-DX-A | 881  | 29.4  | Alive | 3090.37 | High |
| TCGA-DX-A | 1373 | 45.8  | Alive | 3220.17 | High |
| TCGA-DX-A | 2625 | 87.5  | Alive | 3240.94 | High |
| TCGA-DX-A | 513  | 17.1  | Dead  | 3308.33 | High |
| TCGA-DX-A | 1834 | 61.1  | Alive | 3342.4  | High |
| TCGA-DX-A | 1579 | 52.6  | Alive | 3425.95 | High |
| TCGA-DX-A | 4573 | 152.4 | Alive | 3450.81 | High |
| TCGA-DX-A | 2381 | 79.4  | Alive | 3475.58 | High |
| TCGA-DX-A | 1536 | 51.2  | Dead  | 3571.14 | High |
| TCGA-PT-A | 813  | 27.1  | Alive | 3580.7  | High |
| TCGA-VT-A | 326  | 10.9  | Alive | 3607.69 | High |

|            |      |            |              |
|------------|------|------------|--------------|
| TCGA-DX-A  | 427  | 14.2 Dead  | 3740.03 High |
| TCGA-DX-A  | 1121 | 37.4 Alive | 3892.52 High |
| TCGA-DX-A  | 1017 | 33.9 Alive | 3920.65 High |
| TCGA-VT-A  | 796  | 26.5 Alive | 3941.16 High |
| TCGA-PC-A  | 1175 | 39.2 Dead  | 4056.6 High  |
| TCGA-DX-A  | 648  | 21.6 Dead  | 4127.71 High |
| TCGA-3B-A  | 599  | 20 Dead    | 4138.82 High |
| TCGA-QC-A  | 637  | 21.2 Alive | 4158.32 High |
| TCGA-IE-A€ | 605  | 20.2 Alive | 4254.32 High |
| TCGA-X6-A  | 628  | 20.9 Dead  | 4412.71 High |
| TCGA-DX-A  | 2324 | 77.5 Dead  | 4428.84 High |
| TCGA-DX-A  | 404  | 13.5 Dead  | 4488.72 High |
| TCGA-DX-A  | 439  | 14.6 Dead  | 4503.99 High |
| TCGA-PC-A  | 193  | 6.4 Dead   | 4680.47 High |
| TCGA-DX-A  | 541  | 18 Alive   | 4766.77 High |
| TCGA-Z4-A! | 407  | 13.6 Alive | 5084.1 High  |
| TCGA-HS-A  | 1585 | 52.8 Alive | 5383.18 High |
| TCGA-FX-A; | 245  | 8.2 Dead   | 5585.83 High |
| TCGA-JV-A! | 32   | 1.1 Dead   | 5925 High    |
| TCGA-DX-A  | 2030 | 67.7 Alive | 6301.95 High |
| TCGA-JV-A; | 119  | 4 Dead     | 7331.65 High |
| TCGA-DX-A  | 1825 | 60.8 Dead  | 7985.87 High |
| TCGA-MJ-A  | 681  | 22.7 Alive | 8210.74 High |
| TCGA-WK-/  | 363  | 12.1 Dead  | 8645.29 High |
| TCGA-3R-A  | 17   | 0.6 Dead   | 9227.75 High |
| TCGA-WK-/  | 1262 | 42.1 Dead  | 9582.98 High |

1 RNAseqV2 normalized results for all cancers.2
